# Supplementary material for: MicroRNA Profiling of the Inflammatory Response after Early and Late Asthmatic Reaction
Source: MDPI journal article supplement (doi:10.3390/ijms25021356), 2024-01-22
Supplement: s1 [file s1]

**Table S1.** Dysregulated miRNAs in EAR / no LAR compared to controls

| miRNA            | baseMean | log2FoldChange | lfcSE | stat   | pvalue | padj  |
|------------------|----------|----------------|-------|--------|--------|-------|
| hsa_piR_020497   | 3.400    | 4.215          | 1.088 | 3.873  | 0.000  | 0.065 |
| hsa-miR-4435     | 2.610    | 4.574          | 1.232 | 3.712  | 0.000  | 0.065 |
| hsa-miR-4746-5p  | 2.019    | 4.692          | 1.291 | 3.635  | 0.000  | 0.065 |
| hsa-miR-5100     | 67.387   | 0.813          | 0.231 | 3.515  | 0.000  | 0.065 |
| hsa-miR-6849-3p  | 2.331    | -3.455         | 0.987 | -3.502 | 0.000  | 0.065 |
| hsa-miR-708-5p   | 2.052    | 4.270          | 1.262 | 3.383  | 0.001  | 0.084 |
| hsa-miR-3928-3p  | 2.564    | 3.730          | 1.132 | 3.295  | 0.001  | 0.094 |
| hsa-miR-4728-3p  | 2.178    | 3.896          | 1.191 | 3.270  | 0.001  | 0.094 |
| hsa-miR-5196-3p  | 2.493    | -2.915         | 0.910 | -3.205 | 0.001  | 0.094 |
| hsa-miR-6798-3p  | 2.234    | -3.059         | 0.955 | -3.202 | 0.001  | 0.094 |
| hsa-miR-6797-3p  | 2.531    | -3.044         | 0.958 | -3.178 | 0.001  | 0.094 |
| hsa-miR-6766-3p  | 2.764    | -2.673         | 0.857 | -3.120 | 0.002  | 0.094 |
| hsa-miR-6808-3p  | 2.408    | 3.684          | 1.185 | 3.109  | 0.002  | 0.094 |
| hsa-miR-6729-3p  | 2.003    | -3.132         | 1.011 | -3.097 | 0.002  | 0.094 |
| hsa_piR_001170   | 30.446   | 0.923          | 0.299 | 3.087  | 0.002  | 0.094 |
| hsa-miR-320a     | 3774.436 | 0.649          | 0.217 | 2.991  | 0.003  | 0.114 |
| hsa-miR-4707-5p  | 1.549    | 3.821          | 1.283 | 2.978  | 0.003  | 0.114 |
| hsa-miR-6069     | 7.240    | 1.246          | 0.419 | 2.975  | 0.003  | 0.114 |
| hsa_piR_000765   | 121.761  | 0.601          | 0.205 | 2.937  | 0.003  | 0.122 |
| hsa-miR-4487     | 1.489    | -3.459         | 1.184 | -2.921 | 0.003  | 0.122 |
| hsa-miR-4664-5p  | 30.068   | 1.088          | 0.376 | 2.893  | 0.004  | 0.128 |
| hsa-miR-320b     | 146.991  | 0.787          | 0.280 | 2.808  | 0.005  | 0.159 |
| hsa-miR-493-5p   | 2.265    | -2.557         | 0.921 | -2.776 | 0.005  | 0.161 |
| hsa-miR-1236-3p  | 3.545    | -2.360         | 0.851 | -2.773 | 0.006  | 0.161 |
| hsa-miR-4781-5p  | 1.848    | 3.696          | 1.338 | 2.762  | 0.006  | 0.161 |
| hsa-miR-1255a    | 46.974   | -0.843         | 0.311 | -2.713 | 0.007  | 0.180 |
| hsa-miR-4433b-5p | 103.805  | -1.043         | 0.392 | -2.661 | 0.008  | 0.202 |
| hsa-miR-4433b-3p | 1.578    | 4.349          | 1.645 | 2.643  | 0.008  | 0.203 |
| hsa-miR-6825-3p  | 1.475    | 3.771          | 1.436 | 2.627  | 0.009  | 0.203 |
| hsa-miR-6846-3p  | 2.056    | -2.390         | 0.911 | -2.622 | 0.009  | 0.203 |
| hsa-miR-1908-5p  | 1.433    | 3.730          | 1.428 | 2.613  | 0.009  | 0.203 |
| hsa-miR-4433a-3p | 2.744    | -2.395         | 0.941 | -2.545 | 0.011  | 0.239 |
| hsa-miR-6509-3p  | 3.686    | 3.843          | 1.522 | 2.525  | 0.012  | 0.246 |
| hsa-miR-106a-5p  | 23.382   | 0.811          | 0.323 | 2.512  | 0.012  | 0.248 |
| hsa-miR-330-3p   | 1.952    | 3.267          | 1.308 | 2.498  | 0.012  | 0.250 |
| hsa-miR-1224-3p  | 2.702    | -2.344         | 0.949 | -2.470 | 0.014  | 0.262 |
| hsa-miR-935      | 1.515    | 3.855          | 1.575 | 2.447  | 0.014  | 0.262 |
| hsa-miR-548l     | 3.380    | -2.096         | 0.857 | -2.445 | 0.015  | 0.262 |
| hsa-miR-23c      | 5.826    | 1.098          | 0.449 | 2.443  | 0.015  | 0.262 |
| hsa_piR_019914   | 25.352   | 0.639          | 0.265 | 2.414  | 0.016  | 0.276 |
| hsa-miR-4510     | 20.418   | 1.336          | 0.560 | 2.388  | 0.017  | 0.279 |
| hsa-miR-4772-3p  | 22.258   | 0.984          | 0.413 | 2.384  | 0.017  | 0.279 |

|                   |           |        |       |        |       |       |
|-------------------|-----------|--------|-------|--------|-------|-------|
| hsa-miR-1908-3p   | 1.964     | -2.387 | 1.001 | -2.384 | 0.017 | 0.279 |
| hsa-miR-500b-5p   | 52.313    | 0.522  | 0.222 | 2.346  | 0.019 | 0.296 |
| hsa_piR_016735    | 114.008   | 0.597  | 0.255 | 2.345  | 0.019 | 0.296 |
| hsa-miR-6734-5p   | 1.816     | -2.625 | 1.124 | -2.335 | 0.020 | 0.297 |
| hsa-miR-548at-3p  | 1.379     | -2.611 | 1.122 | -2.328 | 0.020 | 0.297 |
| hsa_piR_020814    | 1.455     | 3.707  | 1.599 | 2.318  | 0.020 | 0.299 |
| hsa-miR-4433a-5p  | 2.462     | -2.444 | 1.062 | -2.301 | 0.021 | 0.306 |
| hsa-miR-139-3p    | 1.172     | 3.889  | 1.733 | 2.244  | 0.025 | 0.341 |
| hsa-miR-4732-5p   | 133.829   | 0.705  | 0.315 | 2.241  | 0.025 | 0.341 |
| hsa-miR-589-5p    | 160.180   | 0.401  | 0.180 | 2.234  | 0.025 | 0.341 |
| hsa-miR-2277-3p   | 51.364    | 0.583  | 0.261 | 2.229  | 0.026 | 0.341 |
| hsa-miR-1292-5p   | 52.019    | 0.626  | 0.284 | 2.209  | 0.027 | 0.353 |
| hsa_piR_001311    | 5.596     | 0.913  | 0.416 | 2.195  | 0.028 | 0.359 |
| hsa-miR-6820-3p   | 9.473     | -0.804 | 0.369 | -2.182 | 0.029 | 0.360 |
| hsa-miR-1272      | 32.564    | 0.680  | 0.313 | 2.173  | 0.030 | 0.360 |
| hsa_piR_001312    | 28.418    | 0.566  | 0.262 | 2.162  | 0.031 | 0.360 |
| hsa_piR_018570    | 94.236    | 0.455  | 0.210 | 2.162  | 0.031 | 0.360 |
| hsa-miR-6859-5p   | 3.120     | -1.786 | 0.827 | -2.160 | 0.031 | 0.360 |
| hsa-miR-25-3p     | 94412.794 | 0.415  | 0.194 | 2.137  | 0.033 | 0.374 |
| hsa-miR-103a-2-5p | 21.476    | 0.967  | 0.454 | 2.128  | 0.033 | 0.377 |
| hsa-miR-146b-3p   | 14.566    | 0.809  | 0.384 | 2.106  | 0.035 | 0.391 |
| hsa-miR-30c-5p    | 17172.879 | 0.406  | 0.194 | 2.094  | 0.036 | 0.397 |
| hsa-miR-337-3p    | 1.306     | 3.133  | 1.545 | 2.028  | 0.043 | 0.451 |
| hsa-miR-5684      | 2.385     | 2.543  | 1.256 | 2.024  | 0.043 | 0.451 |
| hsa-miR-942-3p    | 94.387    | 0.571  | 0.282 | 2.023  | 0.043 | 0.451 |
| hsa-miR-3140-3p   | 3.936     | -1.685 | 0.837 | -2.014 | 0.044 | 0.454 |
| hsa-miR-1255b-5p  | 35.087    | 0.469  | 0.236 | 1.988  | 0.047 | 0.468 |
| hsa-miR-6882-3p   | 11.121    | -0.790 | 0.398 | -1.983 | 0.047 | 0.468 |
| hsa_piR_020813    | 26.267    | 0.704  | 0.355 | 1.983  | 0.047 | 0.468 |
| hsa-miR-3179      | 2.195     | 2.473  | 1.254 | 1.973  | 0.049 | 0.472 |
