# Supplementary material for: MicroRNA Profiling of the Inflammatory Response after Early and Late Asthmatic Reaction
Source: MDPI journal article supplement (doi:10.3390/ijms25021356), 2024-01-22
Supplement: s1 [file s1]

**Table S2.** Dysregulated miRNAs in EAR plus LAR compared to controls

| miRNA            | baseMean   | log2FoldChange | lfcSE  | stat    | pvalue | padj   |
|------------------|------------|----------------|--------|---------|--------|--------|
| hsa-miR-4433b-3p | 2.6522     | 4.9556         | 1.1037 | 4.4900  | 0.0000 | 0.0050 |
| hsa-miR-493-5p   | 2.3422     | -3.8703        | 0.9854 | -3.9276 | 0.0001 | 0.0300 |
| hsa_piR_020497   | 3.1430     | 3.9896         | 1.0479 | 3.8071  | 0.0001 | 0.0300 |
| hsa-miR-15a-5p   | 3771.6453  | -0.9822        | 0.2613 | -3.7585 | 0.0002 | 0.0300 |
| hsa-miR-374a-5p  | 355.4327   | -1.2670        | 0.3431 | -3.6932 | 0.0002 | 0.0310 |
| hsa-miR-320a     | 4176.8315  | 0.6839         | 0.1904 | 3.5914  | 0.0003 | 0.0339 |
| hsa_piR_020814   | 2.0874     | 4.1716         | 1.1731 | 3.5560  | 0.0004 | 0.0339 |
| hsa-miR-1908-3p  | 2.0174     | -3.6403        | 1.0343 | -3.5196 | 0.0004 | 0.0339 |
| hsa-miR-4435     | 1.8833     | 4.0247         | 1.1631 | 3.4604  | 0.0005 | 0.0339 |
| hsa-miR-6509-3p  | 3.3541     | 3.6509         | 1.0578 | 3.4515  | 0.0006 | 0.0339 |
| hsa-miR-32-5p    | 34.3247    | -2.2247        | 0.6466 | -3.4407 | 0.0006 | 0.0339 |
| hsa-miR-1299     | 6.4711     | 1.8554         | 0.5410 | 3.4293  | 0.0006 | 0.0339 |
| hsa-miR-4452     | 1.6067     | 4.2349         | 1.2385 | 3.4193  | 0.0006 | 0.0339 |
| hsa-miR-15b-5p   | 18848.3267 | -0.7914        | 0.2399 | -3.2984 | 0.0010 | 0.0441 |
| hsa-miR-548l     | 3.5371     | -2.7883        | 0.8482 | -3.2874 | 0.0010 | 0.0441 |
| hsa-miR-6832-3p  | 1.7301     | 3.8909         | 1.1841 | 3.2859  | 0.0010 | 0.0441 |
| hsa-miR-378c     | 188.4998   | 0.6400         | 0.1956 | 3.2719  | 0.0011 | 0.0441 |
| hsa-miR-3928-3p  | 2.4765     | 3.6148         | 1.1118 | 3.2512  | 0.0011 | 0.0447 |
| hsa-miR-146a-5p  | 998.1599   | 0.4914         | 0.1524 | 3.2245  | 0.0013 | 0.0462 |
| hsa-miR-96-5p    | 583.9982   | -0.8870        | 0.2765 | -3.2075 | 0.0013 | 0.0462 |
| hsa-miR-6797-3p  | 2.9691     | -2.7621        | 0.8638 | -3.1977 | 0.0014 | 0.0462 |
| hsa-miR-20a-5p   | 1474.6951  | -0.8323        | 0.2669 | -3.1186 | 0.0018 | 0.0576 |
| hsa-miR-6808-3p  | 3.7394     | 4.2503         | 1.3679 | 3.1072  | 0.0019 | 0.0576 |
| hsa-miR-6766-3p  | 3.1786     | -2.6100        | 0.8481 | -3.0775 | 0.0021 | 0.0595 |
| hsa-miR-139-3p   | 1.4411     | 4.0528         | 1.3194 | 3.0717  | 0.0021 | 0.0595 |
| hsa-miR-4635     | 2.7896     | -2.6577        | 0.8683 | -3.0609 | 0.0022 | 0.0595 |
| hsa-miR-424-5p   | 36.9837    | -1.0937        | 0.3632 | -3.0110 | 0.0026 | 0.0661 |
| hsa-miR-3939     | 1.7679     | -3.4377        | 1.1463 | -2.9990 | 0.0027 | 0.0661 |
| hsa-miR-708-5p   | 1.6037     | 3.8070         | 1.2707 | 2.9959  | 0.0027 | 0.0661 |
| hsa-miR-337-3p   | 1.8379     | 3.5641         | 1.2150 | 2.9334  | 0.0034 | 0.0783 |
| hsa-miR-3613-5p  | 122.8071   | -1.1526        | 0.4046 | -2.8483 | 0.0044 | 0.0942 |
| hsa-miR-330-3p   | 2.0508     | 3.3111         | 1.1634 | 2.8460  | 0.0044 | 0.0942 |
| hsa-miR-4677-5p  | 1.4470     | 3.6319         | 1.2763 | 2.8456  | 0.0044 | 0.0942 |
| hsa-miR-548ay-5p | 1.7619     | 3.4675         | 1.2235 | 2.8340  | 0.0046 | 0.0948 |
| hsa-miR-4510     | 27.8496    | 1.7661         | 0.6254 | 2.8241  | 0.0047 | 0.0950 |
| hsa-let-7i-5p    | 16371.5304 | 0.7234         | 0.2570 | 2.8150  | 0.0049 | 0.0950 |
| hsa-miR-29b-3p   | 1598.3744  | -0.6777        | 0.2418 | -2.8026 | 0.0051 | 0.0961 |
| hsa-miR-1304-3p  | 84.0172    | 0.7028         | 0.2614 | 2.6883  | 0.0072 | 0.1295 |
| hsa-miR-320b     | 150.0537   | 0.6386         | 0.2376 | 2.6874  | 0.0072 | 0.1295 |
| hsa-miR-3667-5p  | 18.5318    | 1.0273         | 0.3869 | 2.6550  | 0.0079 | 0.1390 |
| hsa-miR-20b-5p   | 836.2309   | -0.6308        | 0.2414 | -2.6135 | 0.0090 | 0.1532 |
| hsa-let-7b-5p    | 15201.0731 | 0.8486         | 0.3278 | 2.5889  | 0.0096 | 0.1581 |

|                  |           |         |        |         |        |        |
|------------------|-----------|---------|--------|---------|--------|--------|
| hsa-miR-3179     | 2.7782    | 2.7876  | 1.0828 | 2.5744  | 0.0100 | 0.1581 |
| hsa-miR-27a-3p   | 167.8322  | -0.7084 | 0.2754 | -2.5727 | 0.0101 | 0.1581 |
| hsa-miR-3667-3p  | 7.7196    | 1.2932  | 0.5031 | 2.5707  | 0.0102 | 0.1581 |
| hsa-miR-6729-3p  | 2.4307    | -2.4106 | 0.9490 | -2.5400 | 0.0111 | 0.1689 |
| hsa-miR-29c-3p   | 960.2901  | -0.5815 | 0.2333 | -2.4926 | 0.0127 | 0.1775 |
| hsa_piR_016742   | 1.5797    | -2.8135 | 1.1313 | -2.4869 | 0.0129 | 0.1775 |
| hsa-miR-4433a-3p | 3.1202    | -2.3270 | 0.9357 | -2.4868 | 0.0129 | 0.1775 |
| hsa-miR-1236-3p  | 4.1638    | -2.1031 | 0.8498 | -2.4749 | 0.0133 | 0.1775 |
| hsa-miR-1306-3p  | 10.5271   | 0.8997  | 0.3641 | 2.4706  | 0.0135 | 0.1775 |
| hsa-miR-3143     | 9.2517    | -0.8627 | 0.3504 | -2.4617 | 0.0138 | 0.1775 |
| hsa-miR-301a-3p  | 28.1463   | -0.9083 | 0.3694 | -2.4586 | 0.0139 | 0.1775 |
| hsa-miR-5010-5p  | 3.5275    | 1.5881  | 0.6465 | 2.4565  | 0.0140 | 0.1775 |
| hsa-miR-1285-3p  | 51.0851   | -0.4679 | 0.1905 | -2.4559 | 0.0141 | 0.1775 |
| hsa-miR-3622a-3p | 1.3404    | -3.4229 | 1.3955 | -2.4527 | 0.0142 | 0.1775 |
| hsa-miR-6513-5p  | 3.8470    | -2.1155 | 0.8663 | -2.4420 | 0.0146 | 0.1796 |
| hsa-miR-3960     | 1.3676    | 3.5253  | 1.4594 | 2.4156  | 0.0157 | 0.1898 |
| hsa-miR-21-5p    | 2059.1753 | -0.5953 | 0.2471 | -2.4091 | 0.0160 | 0.1898 |
| hsa-miR-4746-5p  | 1.3772    | 3.9998  | 1.6673 | 2.3990  | 0.0164 | 0.1898 |
| hsa-miR-126-5p   | 634.5202  | -0.8434 | 0.3518 | -2.3973 | 0.0165 | 0.1898 |
| hsa-miR-144-3p   | 251.3118  | -1.4745 | 0.6173 | -2.3888 | 0.0169 | 0.1911 |
| hsa-miR-6849-3p  | 3.0197    | -2.0642 | 0.8671 | -2.3806 | 0.0173 | 0.1923 |
| hsa-miR-4487     | 1.8445    | -2.6026 | 1.0960 | -2.3747 | 0.0176 | 0.1924 |
| hsa-miR-4707-5p  | 1.3104    | 3.4674  | 1.4688 | 2.3608  | 0.0182 | 0.1967 |
| hsa-miR-454-3p   | 563.6565  | -0.5343 | 0.2278 | -2.3456 | 0.0190 | 0.2012 |
| hsa-miR-378a-3p  | 578.0606  | 0.4585  | 0.1958 | 2.3411  | 0.0192 | 0.2012 |
| hsa-miR-20a-3p   | 8.8413    | -0.8773 | 0.3806 | -2.3048 | 0.0212 | 0.2157 |
| hsa-miR-4714-3p  | 2.4188    | -2.1238 | 0.9231 | -2.3009 | 0.0214 | 0.2157 |
| hsa-miR-18b-5p   | 1.8146    | -2.5717 | 1.1189 | -2.2985 | 0.0215 | 0.2157 |
| hsa-miR-4433a-5p | 2.7792    | -2.3513 | 1.0388 | -2.2635 | 0.0236 | 0.2318 |
| hsa-miR-23c      | 6.7504    | 1.1683  | 0.5172 | 2.2588  | 0.0239 | 0.2318 |
| hsa-miR-4676-3p  | 1.3726    | -2.5616 | 1.1360 | -2.2549 | 0.0241 | 0.2318 |
| hsa-miR-4662a-5p | 2.4994    | -2.4239 | 1.0861 | -2.2318 | 0.0256 | 0.2427 |
| hsa-miR-27b-3p   | 178.7583  | -0.4852 | 0.2180 | -2.2253 | 0.0261 | 0.2436 |
| hsa-miR-320c     | 48.3094   | 0.5864  | 0.2659 | 2.2056  | 0.0274 | 0.2529 |
| hsa_piR_020829   | 14.4264   | -0.6694 | 0.3062 | -2.1862 | 0.0288 | 0.2622 |
| hsa-miR-1294     | 62.6215   | 0.5732  | 0.2631 | 2.1787  | 0.0294 | 0.2638 |
| hsa-miR-122-5p   | 10.3894   | 1.0930  | 0.5044 | 2.1668  | 0.0302 | 0.2668 |
| hsa-miR-98-3p    | 2.3968    | -2.1025 | 0.9715 | -2.1642 | 0.0305 | 0.2668 |
| hsa-miR-4732-5p  | 136.4168  | 0.5588  | 0.2597 | 2.1519  | 0.0314 | 0.2673 |
| hsa-let-7e-5p    | 42.0489   | 0.5545  | 0.2580 | 2.1489  | 0.0316 | 0.2673 |
| hsa-miR-140-5p   | 50.7629   | -0.5594 | 0.2603 | -2.1488 | 0.0316 | 0.2673 |
| hsa-miR-1224-3p  | 3.2196    | -1.9737 | 0.9287 | -2.1251 | 0.0336 | 0.2802 |
| hsa-miR-664a-5p  | 17.9793   | 0.6206  | 0.2936 | 2.1140  | 0.0345 | 0.2846 |
| hsa-miR-194-5p   | 2852.2874 | -0.3213 | 0.1523 | -2.1093 | 0.0349 | 0.2847 |

|                  |            |         |        |         |        |        |
|------------------|------------|---------|--------|---------|--------|--------|
| hsa-miR-199b-3p  | 5.0360     | -2.4295 | 1.1613 | -2.0920 | 0.0364 | 0.2936 |
| hsa-miR-26b-5p   | 3794.7920  | -0.5571 | 0.2689 | -2.0715 | 0.0383 | 0.3042 |
| hsa-miR-4728-3p  | 1.1702     | 2.8249  | 1.3659 | 2.0681  | 0.0386 | 0.3042 |
| hsa-miR-151a-3p  | 3333.9998  | 0.3935  | 0.1929 | 2.0396  | 0.0414 | 0.3224 |
| hsa-miR-376a-3p  | 12.4015    | -1.0534 | 0.5188 | -2.0304 | 0.0423 | 0.3259 |
| hsa-miR-144-5p   | 2013.2137  | -0.7016 | 0.3474 | -2.0197 | 0.0434 | 0.3280 |
| hsa-miR-1273h-3p | 11.9062    | 0.7120  | 0.3529 | 2.0174  | 0.0437 | 0.3280 |
| hsa-miR-624-5p   | 20.3265    | -0.6992 | 0.3471 | -2.0143 | 0.0440 | 0.3280 |
| hsa_piR_019420   | 1.4052     | 3.5792  | 1.7833 | 2.0070  | 0.0447 | 0.3287 |
| hsa-miR-374a-3p  | 8.0803     | -1.0412 | 0.5213 | -1.9972 | 0.0458 | 0.3287 |
| hsa-miR-589-5p   | 169.8919   | 0.3138  | 0.1574 | 1.9939  | 0.0462 | 0.3287 |
| hsa-miR-4781-5p  | 1.1706     | 2.8413  | 1.4340 | 1.9814  | 0.0475 | 0.3287 |
| hsa-miR-935      | 1.0727     | 3.1693  | 1.6005 | 1.9802  | 0.0477 | 0.3287 |
| hsa-miR-142-5p   | 16319.9528 | -0.3696 | 0.1869 | -1.9780 | 0.0479 | 0.3287 |
| hsa-miR-376c-3p  | 8.2364     | -1.0672 | 0.5405 | -1.9746 | 0.0483 | 0.3287 |
| hsa-miR-6825-3p  | 1.0541     | 3.1277  | 1.5844 | 1.9740  | 0.0484 | 0.3287 |
| hsa-miR-3688-5p  | 2.1648     | -1.9179 | 0.9718 | -1.9736 | 0.0484 | 0.3287 |
| hsa-miR-548d-5p  | 14.2387    | -0.6782 | 0.3442 | -1.9706 | 0.0488 | 0.3287 |
